# Supplementary material for: Microfluidic emulsions with dynamic compound drops
Source: Royal Society of Chemistry journal article supplement (doi:10.1039/b904119b), 2009-01-01
Supplement: b904119b.pdf [file b904119b.pdf]

**B904119B: Microfluidic emulsions with dynamic compound drops**

**Electronic supporting information**

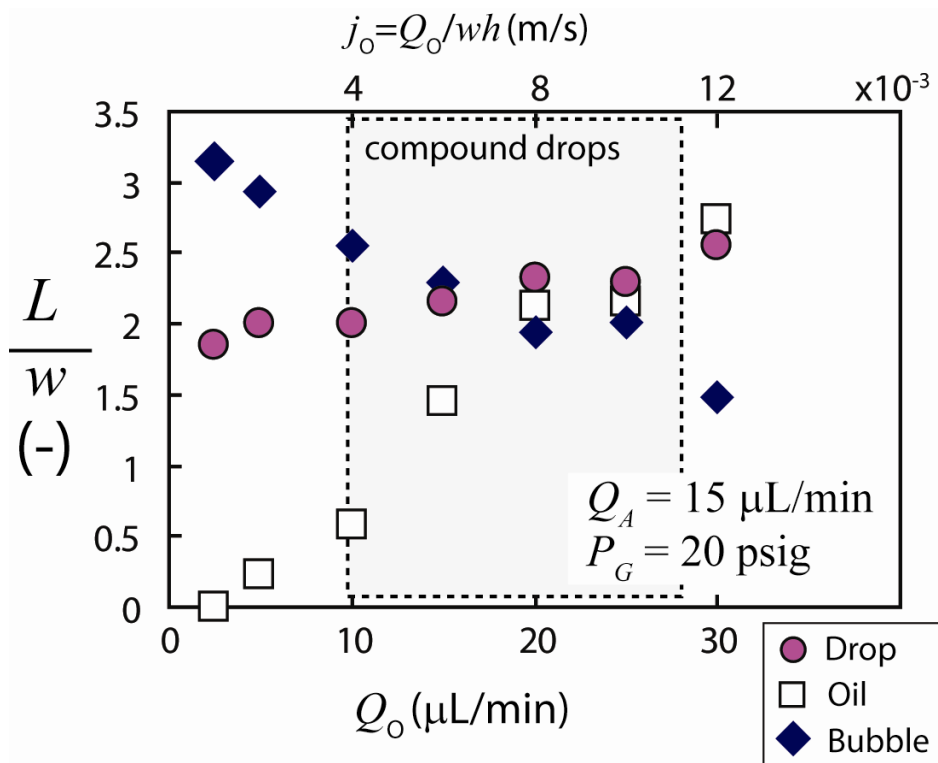

**Supplementary Figure S1:** Graph of dimensionless bubble length, drop length and oil segment length versus oil volumetric flow rate  $Q_o$ , at constant aqueous flow rate  $Q_A$  and gas supply pressure  $P_G$ .
